# Supplementary material
Source: PubMed Central journal article supplement (PMC3498465)
Supplement: NIHMS410802-supplement-1_si_001.pdf [file NIHMS410802-supplement-1_si_001.pdf]

**Supporting Information for *Improving the comprehensiveness and sensitivity of sheathless tITP-CE-MS/MS for proteomic analysis with solid-phase microextraction multistep elution***

|                            |                                                                                                                       |
|----------------------------|-----------------------------------------------------------------------------------------------------------------------|
| <b>Supporting Figure 1</b> | Schematic of the SPME-CE-MS/MS platform                                                                               |
| <b>Supporting Figure 2</b> | Effect of electric field on SPME-CE-MS/MS separation                                                                  |
| <b>Supporting Figure 3</b> | Base peak electropherogram for 5-step SPME multistep elution tITP-CE-MS/MS of 100 ng <i>Pfu</i> digest                |
| <b>Supporting Figure 4</b> | Base peak chromatogram for nLC-MS/MS of 100 ng <i>Pfu</i> digest                                                      |
| <b>Supporting Figure 5</b> | Venn diagrams of all identified peptides and proteins                                                                 |
| <b>Supporting Figure 6</b> | Histograms of peptide physicochemical properties                                                                      |
| <b>Supporting Figure 7</b> | Comparison of peptide precursor intensity, S/N ratio, and XCorr for 100 ng <i>Pfu</i> digest analysis with CE and nLC |
| <b>Supporting Table 1</b>  | Description of MS RAW files                                                                                           |

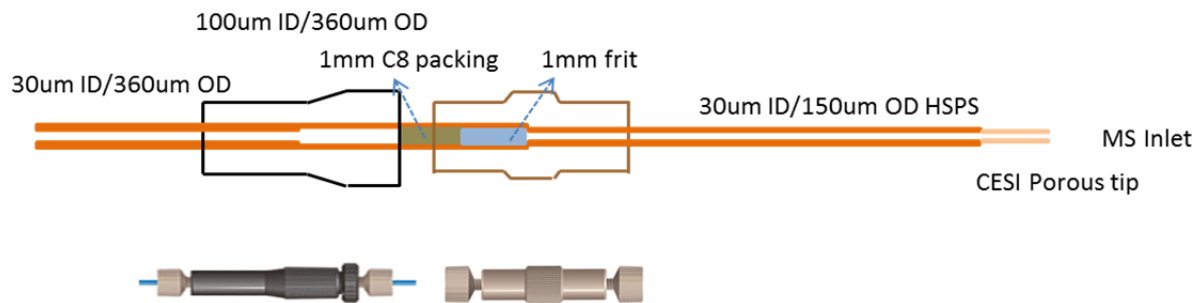

**Supporting Figure 1:** Schematic of the SPME-CE-MS/MS platform. The SPME column was sandwiched between two pieces of 30  $\mu\text{m}$  ID capillaries, the frit end was connected to the HSPS through a zero dead volume union and the open end was connected to the inlet capillary with an Upchurch inline microfilter.

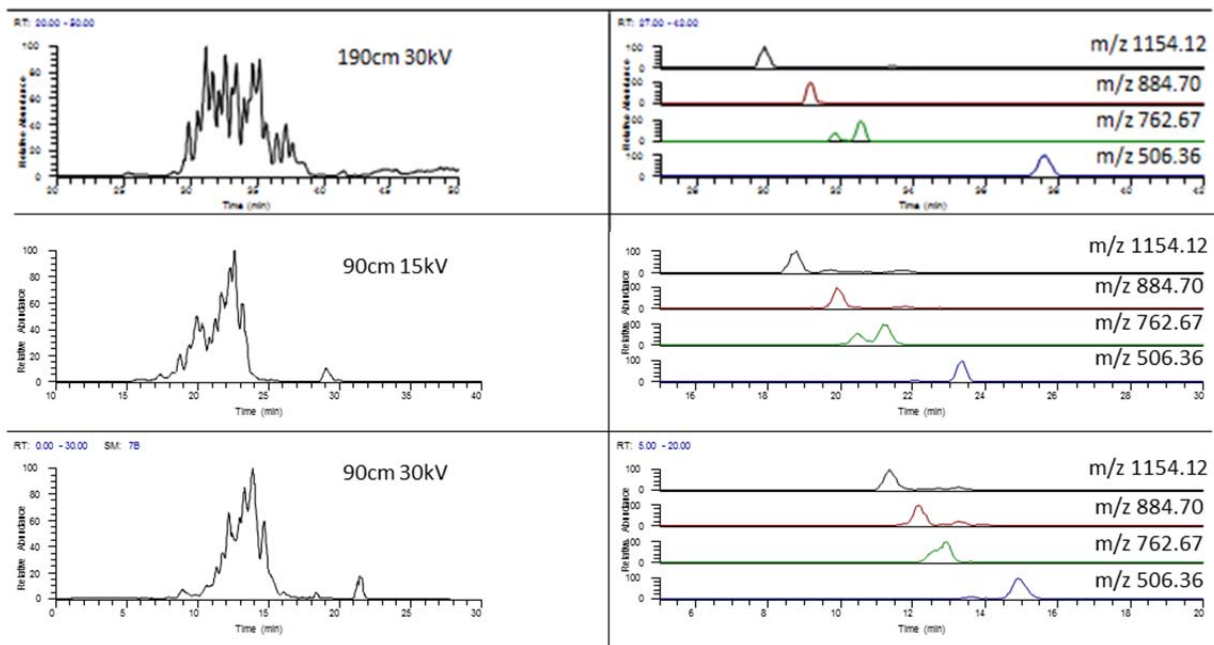

**Supporting Figure 2:** Effect of electric field on SPME-CE-MS/MS separation. The electropherograms of one step elution and CE separation of 16 protein mixture tryptic digests using 190 cm and 30 kV (158 V/cm), 90 cm and 15 kV (167 V/cm), and 90 cm and 30 kV (333 V/cm). The extracted ion electropherograms of 3 representative ions are shown from all three runs. Run conditions: 95 mM acetic acid (HOAc) - 5% methanol (MeOH) pH 3.1 was used as the background electrolyte. Peptides were eluted with 100 nL 95% MeOH - 50 mM NH<sub>4</sub>Ac, pH 4.5. 15 or 30 kV was applied at the inlet of both 90 cm and 190 cm capillaries. MS/MS acquisition began upon application of the separation voltage.

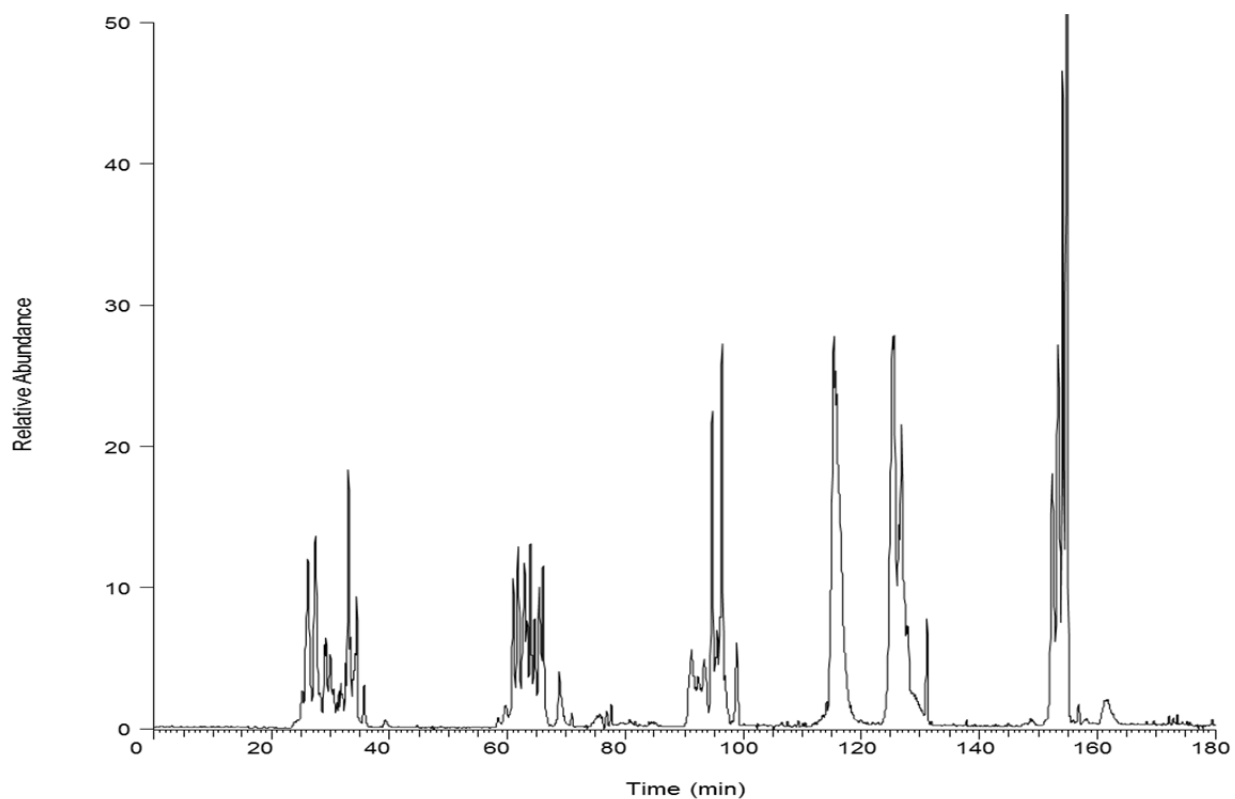

**Supporting Figure 3:** Base peak electropherogram for 5-step SPME multistep elution tITP-CE-MS/MS of 100 ng *Pfu* digest. The *Pfu* digest was first hydrodynamically loaded onto the SPME column followed by the electrokinetic elution by 5 increasing organic strength buffers (10%-10%, 20%-20%, 30%-30%, 40%-40% and 48%-48% MeOH-IPA-50mM NH<sub>4</sub>Ac, pH 4.5) at 15kV for 2.5min, followed by 35min CE separation at 30kV. The multistep electrokinetic elution and CE separation was repeated until the last organic buffer was injected and separation finished.

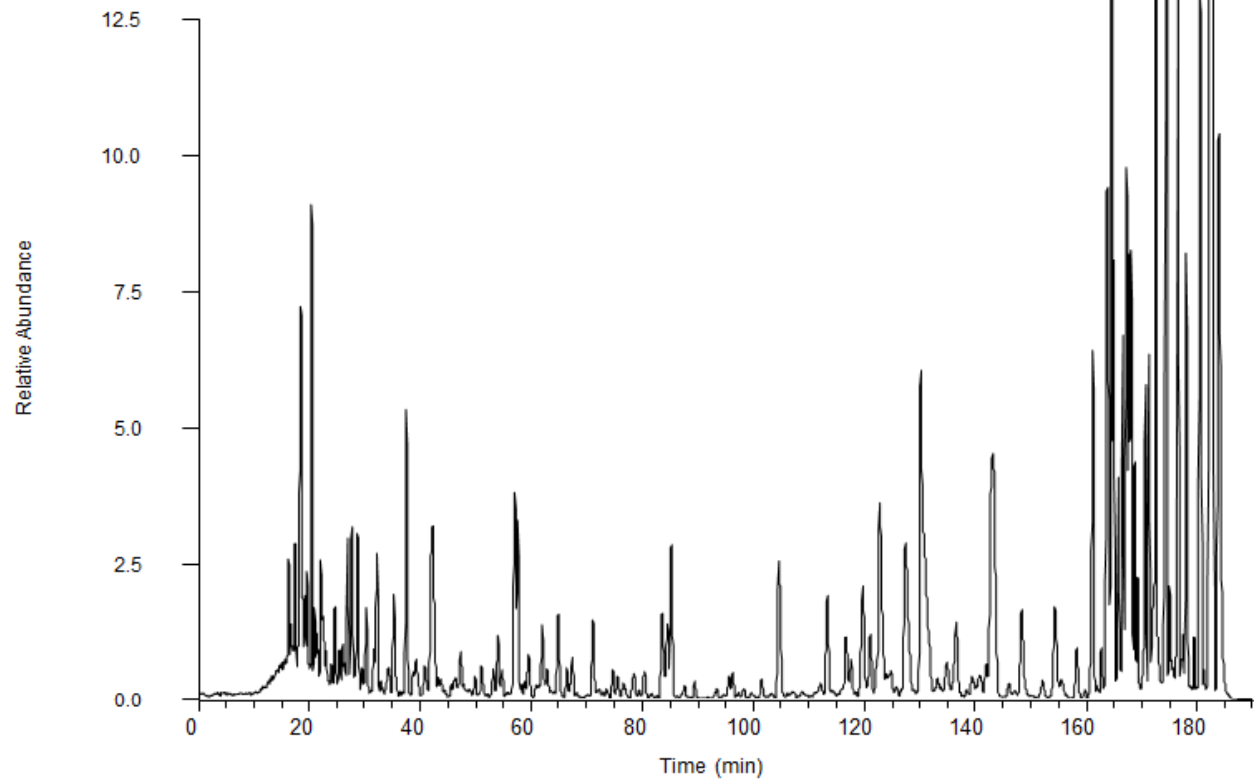

**Supporting Figure 4:** Base peak chromatogram for nLC-MS/MS of 100 ng *Pfu* digest.

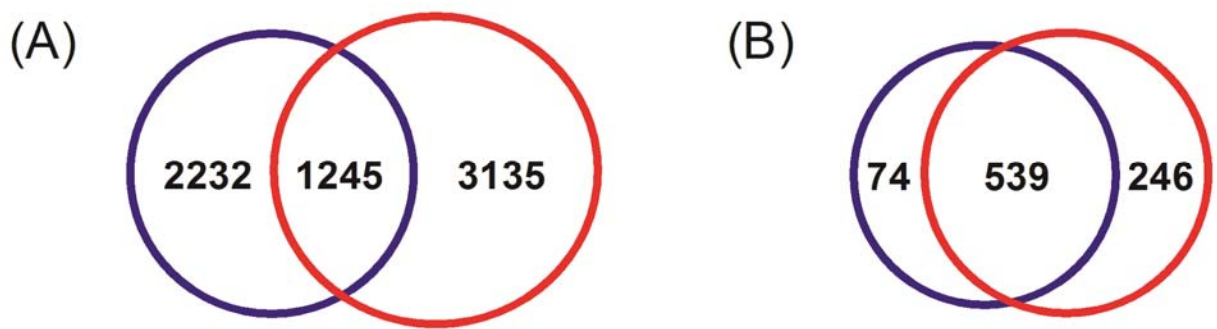

**Supporting Figure 5:** Venn diagrams of identified (A) peptides and (B) proteins combined from duplicate analysis of 5, 25, 50, and 100 ng *Pfu* digests using SPME-tITP-CE (blue) and nLC (red). Identified peptides and proteins for these Venn diagrams are listed in the Supporting Information Excel file.

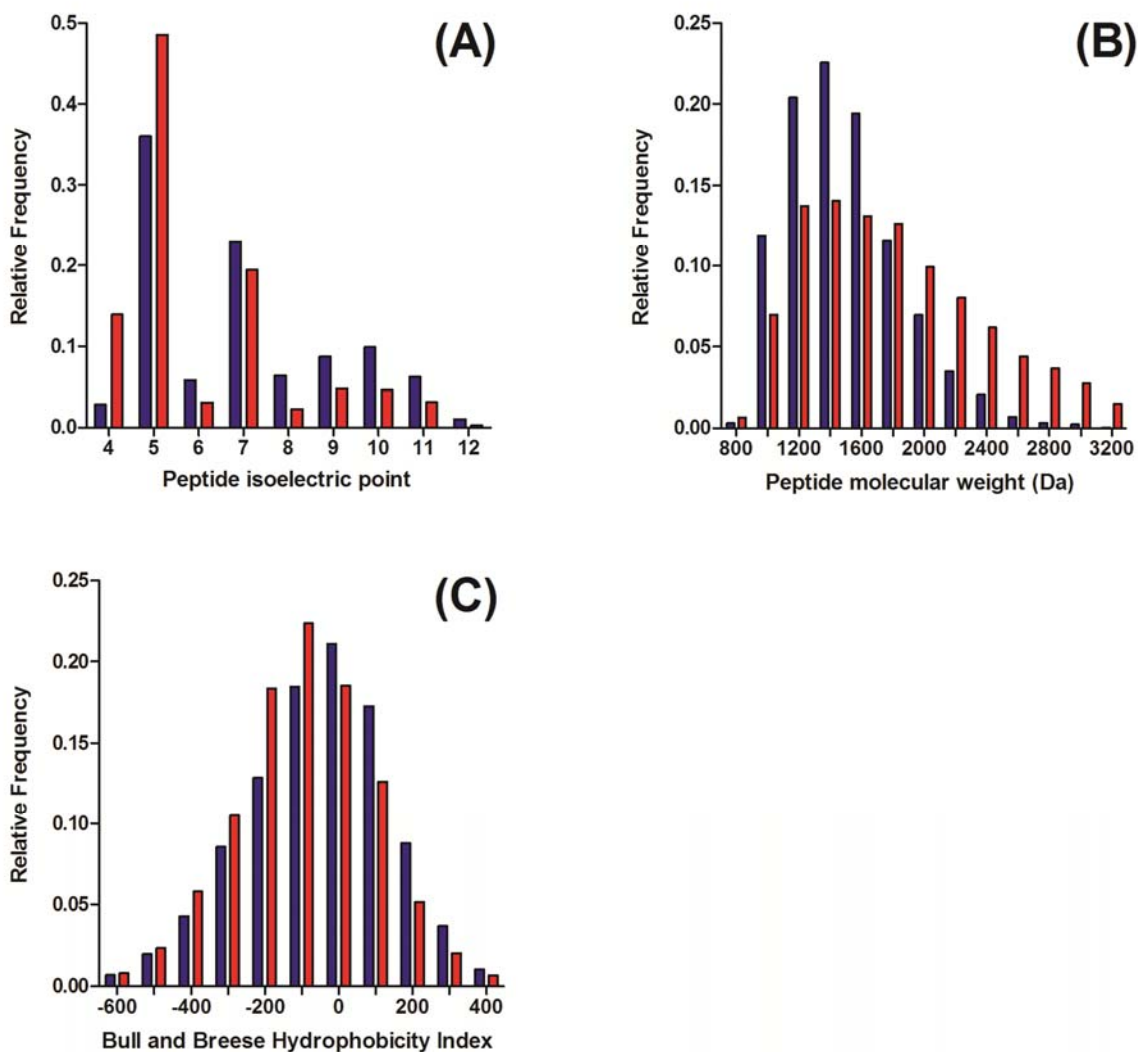

**Supporting Figure 6:** Histograms of (A) isoelectric point, (B) molecular weight, and (C) Bull and Breese hydrophobicity index of peptides identified from 5, 25, 50 and 100 ng duplicate runs of *Pfu* using both SPME-tITP-CE(blue) and nLC(red).

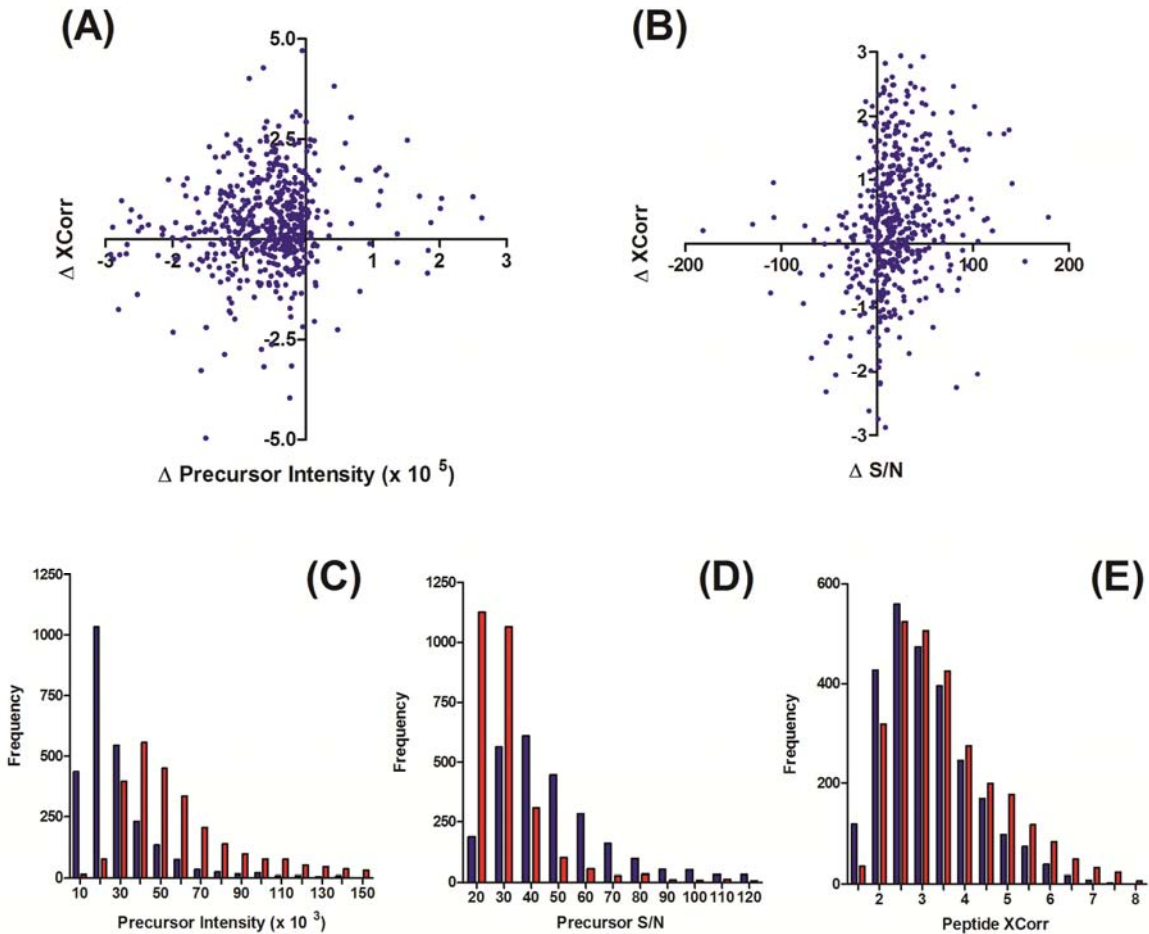

**Supporting Figure 7:** Comparison of peptide precursor intensity, signal-to-noise ratio (S/N), and XCorr from duplicate analysis of 100 ng of *Pfu* tryptic digests using 5-step SPME-tITP-CE-MS/MS and nLC-MS/MS. Correlation plots of changes (CE values – nLC values) in (A) precursor intensity and (B) S/N to changes in XCorr values of peptides identified in both CE and nLC experiments. Distributions of peptide (C) precursor intensities, (D) S/N ratios and (E) XCorr values were plotted for CE (blue) and nLC (red) experiments. Noise was calculated by averaging the peak intensities from the lowest 10% of peaks from the corresponding precursor MS scan. S/N ratios were calculated by dividing peptide precursor intensities by the noise within each scan.



**Supporting Table 1:** Description of MS RAW files.

We have provided all analyzed RAW data files for this work at: <http://fields.scripps.edu/published/SPME-CE2012/>

The file structure is the same as figure structures where .RAW files are placed in the appropriately named folder of the figure annotation (i.e. data for Figures 1A & B is in folder structure Figure1/AB/). For some consecutive CE runs we continuously acquired MS data files and later parsed them into their corresponding runs at the .MS2 file level. The following table describes the time windows in the .RAW files for which their data was extracted.

| <b>Figure descriptions</b>                         | <b>Website link structures</b>                                       | <b>.RAW file names</b>                                                                                                                                                           | <b>Time windows analyzed</b> |
|----------------------------------------------------|----------------------------------------------------------------------|----------------------------------------------------------------------------------------------------------------------------------------------------------------------------------|------------------------------|
| <b>Figure 1A and 1B:</b><br>90 cm capillary        | Figure1<br>AB                                                        | 110520_CEMS_16PM_95MeOH_50NH<br>4Ac_30kV_90cm.raw                                                                                                                                | 17 – 37 min                  |
| <b>Figure 1C and 1D:</b><br>190 cm capillary       | Figure 1<br>CD                                                       | 110520_CEMS_16PM_95MeOH_50NH<br>4Ac_30kV_190cm.raw                                                                                                                               | 33 – 83 min                  |
| <b>Figure 2: Direct Injection<br/>Replicates</b>   | Figure 2<br>DCE<br>Replicate1<br>Replicate2                          | 120802_CEMS_16PM_DCE_1.raw<br>120802_CEMS_16PM_DCE_2.raw                                                                                                                         | Entire run/file              |
| <b>Figure 2: 95% MeOH<br/>Replicates</b>           | Figure 2<br>95%MeOH<br>Replicate1<br>Replicate2<br>Replicate3        | 110606_CEMS_16PM_95MeOH_50NH<br>4Ac_30kV_190cm.raw<br>110705_CEMS_16PM_95MeOH_50NH<br>4Ac_30kV_190cm.raw<br>110706_CEMS_16PM_95MeOH_50NH<br>4Ac_30kV_190cm.raw                   | Entire run/file              |
| <b>Figure 2: 85% MeOH –<br/>10% IPA Replicates</b> | Figure 2<br>85%MeOH-10%IPA<br>Replicate1<br>Replicate2<br>Replicate3 | 110713_CEMS_16PM_85MeOH_10IPA<br>_50NH4Ac_30kV_190cm.raw<br>110715_CEMS_16PM_85MeOH_10IPA<br>_50NH4Ac_30kV_190cm.raw<br>110721_CEMS_16PM_85MeOH_10IPA<br>_50NH4Ac_30kV_190cm.raw | Entire run/file              |

|                                                                                                 |                                                       |                                                                                                              |                                                                                                                                                           |
|-------------------------------------------------------------------------------------------------|-------------------------------------------------------|--------------------------------------------------------------------------------------------------------------|-----------------------------------------------------------------------------------------------------------------------------------------------------------|
| <b>Figure 2:</b> 48% MeOH – 48% IPA Replicate 1 & 2                                             | Figure2<br>48%MeOH-48%IPA<br>Replicate1<br>Replicate2 | 110727_CEMS_16PM_48MeOH_48IPA_50NH4Ac_30kV_190cm.raw<br>110801_CEMS_16PM_48MeOH_48IPA_50NH4Ac_30kV_190cm.raw | Entire run/file                                                                                                                                           |
| <b>Figure 2:</b> 48% MeOH – 48% IPA Replicate 3                                                 | Figure2<br>48%MeOH-48%IPA<br>Replicate3               | 110803_CEMS_16PM_48MeOH_48IPA_50NH4Ac_30kV_190cm.raw                                                         | 40 – 100 min                                                                                                                                              |
| <b>Figure 3:</b> 10 kV elution; 50 mM BGE; 0.5, 1, 1.5, 2, 2.5, 3, 3.5, and 5 min elution times | Figure3<br>50mM_BGE_10kV                              | 111017_CEMS_16PM_48MeOH_48IPA_95mMBGE_10kV_190cm.raw                                                         | 1 min: 0 – 70 min<br>1.5: 105 – 175<br>2: 220 – 290<br>2.5: 340 – 410<br>3: 450 – 520<br>3.5: 560 – 630<br>4: 670 – 740<br>4.5: 780 – 850<br>5: 890 – 960 |
| <b>Figure 3:</b> 15 kV elution; 50 mM BGE; 0.5, 1, 1.5, 2, 2.5, 3, 3.5, and 5 min elution times | Figure3<br>50mM_BGE_15kV                              | 111017_CEMS_16PM_48MeOH_48IPA_95mMBGE_15kV_190cm.raw                                                         | 1 min: 0 – 70 min<br>1.5: 105 – 175<br>2: 220 – 290<br>2.5: 320 – 390<br>3: 430 – 500<br>3.5: 540 – 610<br>4: 880 – 950<br>4.5: 770 – 840<br>5: 655 – 725 |
| <b>Figure 3:</b> 10 kV elution; 95 mM BGE; 0.5, 1, 1.5, 2, 2.5, 3, 3.5, and 5 min elution times | Figure3<br>95mM_BGE_10kV                              | 111017_CEMS_16PM_48MeOH_48IPA_50mMBGE_10kV_190cm.raw                                                         | 0.5 min: 0 – 70 min<br>1: 110 – 180<br>1.5: 220 – 290<br>2: 330 – 400<br>2.5: 440 – 510<br>3: 550 – 620<br>3.5: 660 – 730<br>5: 770 – 840                 |

|                                                                                                                       |                                                                                                                                    |                                                                                                                                                                                                        |                                                                                                                                             |
|-----------------------------------------------------------------------------------------------------------------------|------------------------------------------------------------------------------------------------------------------------------------|--------------------------------------------------------------------------------------------------------------------------------------------------------------------------------------------------------|---------------------------------------------------------------------------------------------------------------------------------------------|
| <b>Figure 3:</b> 15 kV elution; 95 mM BGE; 0.5, 1, 1.5, 2, 2.5, 3, 3.5, and 5 min elution times                       | Figure3<br>95mM_BGE_15kV                                                                                                           | 111017_CEMS_16PM_48MeOH_48IPA_50mMBGE_15kV_190cm.raw                                                                                                                                                   | 0.5 min: 40 – 110 min<br>1: 147 – 217<br>1.5: 260 – 330<br>2: 370 – 440<br>2.5: 480 – 550<br>3: 595 – 665<br>3.5: 710 – 780<br>5: 820 – 890 |
| <b>Figure 4:</b> 15 kV elution for 2.5 min with; 0, 25, 50, 75, and 100mM NH <sub>4</sub> OAc                         | Figure4                                                                                                                            | 111025_CEMS_16PM_48MeOH_48IPA_30kV_190cm_tITP.raw                                                                                                                                                      | 0 mM: 520 – 580 min<br>25: 620 – 680<br>50: 720 – 780<br>75: 820 – 880<br>100: 920 – 980                                                    |
| <b>Figure5:</b> Replicate 1 of <i>Pfu</i> dilution series (5, 25, 50, 100 ng starting mass)                           | Figure5<br>CE<br>Replicate1                                                                                                        | 111026_CE_Successive_5_25_50_100ng_Pfu_180min.raw                                                                                                                                                      | 5 ng: 0 – 190 min<br>25: 220 – 410<br>50: 435 – 625<br>100: 655 – 845                                                                       |
| <b>Figure5:</b> Replicate 2 of <i>Pfu</i> dilution series (5, 25, 50, 100 ng starting mass)                           | Figure5<br>CE<br>Replicate2                                                                                                        | 111027_CE_Successive_5_25_50_100ng_Pfu_180min.raw                                                                                                                                                      | 5 ng: 20 – 220 min<br>25: 240 – 440<br>50: 460 – 660<br>100: 680 – 880                                                                      |
| <b>Figure 5:</b> Replicates 1 and 2 of <i>Pfu</i> dilution series (5, 25, 50, 100 ng starting mass) from nLC analysis | Figure5<br>nLC<br>5ng<br>Replicate1<br>Replicate2<br>25ng<br>Replicate1<br>Replicate2<br>50ng<br>Replicate1<br>Replicate2<br>100ng | 111006_nLC_5ng_Pfu_180min.raw<br>120118_nLC_5ng_Pfu_180min.raw<br>120111_nLC_25ng_Pfu_180min.raw<br>120118_nLC_25ng_Pfu_180min.raw<br>120113_nLC_50ng_Pfu_180min.raw<br>120119_nLC_50ng_Pfu_180min.raw | Entire run/file                                                                                                                             |

|                                                                                |                                                                |                                                                                                                                                              |                 |
|--------------------------------------------------------------------------------|----------------------------------------------------------------|--------------------------------------------------------------------------------------------------------------------------------------------------------------|-----------------|
|                                                                                | Replicate1<br>Replicate2                                       | 120118_nLC_100ng_Pfu_180min.raw<br>120113_nLC_100ng_Pfu_180min.raw                                                                                           |                 |
| <b>Figure 5: Replicate 1 and 2 of 5 ng <i>Pfu</i> with direct injection CE</b> | Figure 5<br>DCE<br>Replicate1<br>Replicate2                    | 120718_DCE_5ng_Pfu_1.raw<br>120718_DCE_5ng_Pfu_2.raw                                                                                                         | Entire run/file |
| <b>Supporting Figure 2:</b>                                                    | SupportingFigure2<br>190cm30kV<br><br>90cm15kV<br><br>90cm30kV | 120628_CEMS_16PM_95MeOH_50NH<br>4Ac_30kV_190cm.raw<br>120628_CEMS_16PM_95MeOH_50NH<br>4Ac_15kV_90cm.raw<br>120628_CEMS_16PM_95MeOH_50NH<br>4Ac_30kV_90cm.raw | Entire run/file |
